# Supplementary material for: Quadruple hydrogen bonded self-assemblies of 5,5′-bisdiazo-dipyrromethane
Source: Royal Society of Chemistry journal article supplement (doi:10.1039/b802599a), 2008-01-01

ESI of B802599A

### Quadruple hydrogen bonded self-assemblies of 5,5'-bisdiazo-dipyrromethane

Zhenming Yin <sup>a,\*</sup>, Wuyan Wang <sup>a</sup>, Jianhuan Guo <sup>a</sup>, Jiachun Wang <sup>a</sup>, Jiaqi He <sup>b</sup>, Jin-Pei Cheng <sup>b,\*</sup>

*a: College of Chemistry and Life Science, Tianjin Key Laboratory of Cyto-Genetical and Molecular Regulation, Tianjin Normal University, Tianjin 300387, China; E-mail: [tjyinzm@yahoo.com.cn](mailto:tjyinzm@yahoo.com.cn)*

*b: Department of Chemistry, State Key Laboratory of Elemento-Organic Chemistry, Nankai University, Tianjin 300071, China; E-mail: [Chengjp@nankai.edu.cn](mailto:Chengjp@nankai.edu.cn)*

#### S1. Synthesis of compounds 1 and 2.

(i) A 0.5 M solution of the aromatic amine (5 mmol) and aqueous HCl (4 mL) in water (4 mL) was treated with a 0.5 M solution of NaNO<sub>2</sub> (0.35 g, 5 mmol) in water (10 mL), and the mixture was stirred at room temperature for 0.5 h.

(ii) The diazonium salt solution previously prepared (5.0 mmol) was added drop wise to the solution of dipyrromethane (0.5 g, 2.5 mmol) in acetonitrile (25 ml) and three drops of acetic acid. The combined solution was maintained at room temperature for 2 h with stirring. After this time, EtOAc (25 ml) and water (25 ml) were added. The organic layer was separated and washed with water (20 ml) and dried with anhydrous MgSO<sub>4</sub>. The dried solution was evaporated and the residue was purified by column chromatography on silica.

Compound 1: orange powder, 0.58 g, yield 57%, m.p.=177 °C, <sup>1</sup>H NMR (400MHz, CDCl<sub>3</sub>); δ 9.28 (s, 2H, pyrrole NH), 7.69 (d, J=4 Hz, 4H, CH), 7.39 (t, J=8 Hz, 4H, CH), 7.30 (t, J=7.2 Hz, 2H, CH), 6.92 (d, J=4 Hz, 2H, Py CH), 6.19 (d, J=4 Hz, 2H, Py CH), 1.79 (q, J=7.2 Hz, 4H, -CH<sub>2</sub>-), 0.59 (t, J=7.2 Hz, 6H, -CH<sub>3</sub>); <sup>13</sup>C NMR (100 MHz, CDCl<sub>3</sub>): δ 8.5, 27.2, 44.0, 111.3, 117.4, 122.0, 122.2, 129.3, 141.9, 146.0, 152.7; FAB-MS: 411 (M+1); Elemental analysis: C<sub>25</sub>H<sub>26</sub>N<sub>6</sub>: Calcd: C, 73.14; H, 6.38; N, 20.47. Found: C, 73.05; H, 6.40; N, 20.55.

Compound 2: orange powder, 0.59 g, yield 54%, m.p.=235 °C, <sup>1</sup>H NMR (400MHz, CDCl<sub>3</sub>); δ 9.11 (s, 2H, pyrrole NH), 7.61 (d, J=8 Hz, 4H, CH), 7.15 (t, J=8 Hz, 4H,

CH), 6.89 (d,  $J=4$  Hz, 2H, Py CH), 6.22 (d,  $J=4$  Hz, 2H, Py CH), 2.37 (s, 6H, -CH<sub>3</sub>), 1.89 (q,  $J=7.2$  Hz, 4H, -CH<sub>2</sub>-), 0.66 (t,  $J=7.2$  Hz, 6H, -CH<sub>3</sub>); <sup>13</sup>C NMR (75 MHz, CDCl<sub>3</sub>):  $\delta$  7.94, 21.4, 27.7, 43.9, 110.6, 115.9, 121.8, 129.6, 139.4, 140.8, 145.7, 150.6; FAB-MS: 439 (M+1); Elemental analysis: C<sub>27</sub>H<sub>30</sub>N<sub>6</sub>: Calcd: C, 73.94; H, 6.89; N, 19.16. Found: C, 73.85; H, 6.62; N, 19.39.

**S2.** <sup>1</sup>H NMR spectrum of **2** in CDCl<sub>3</sub> solution showing the dimerization induced shift changes (concentrations from bottom to top: 2, 5, 10, 15, 20, 25 mM).

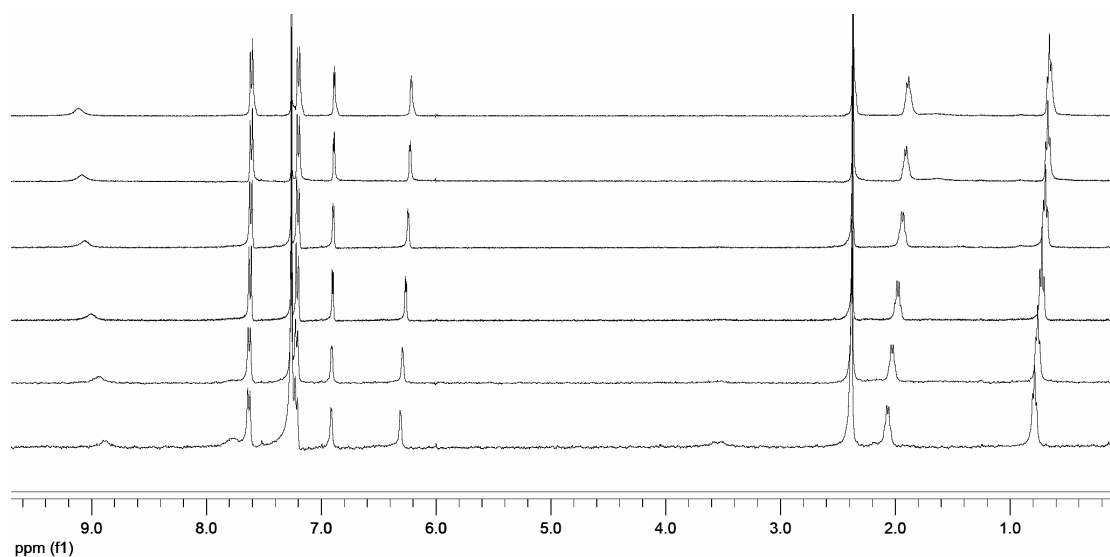

Supplement: b802599a.pdf [file b802599a.pdf]
